# Supplementary material
Source: Springer Nature journal article supplement (https://www.springermedizin.de/resource/supplementary/13058_2013_3373_MOESM3_ESM.pdf/9703976)

**A. Numbers per treatment group pre-interim analysis**

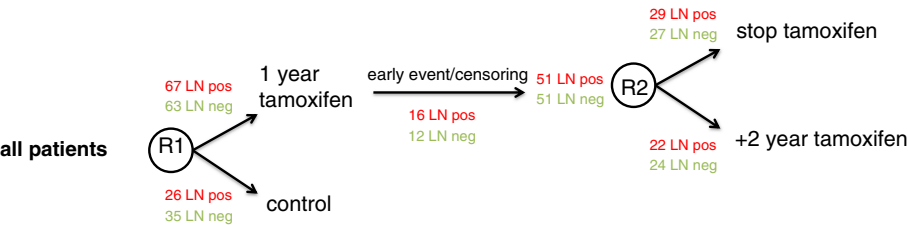

**B. Numbers per treatment group post-interim analysis**

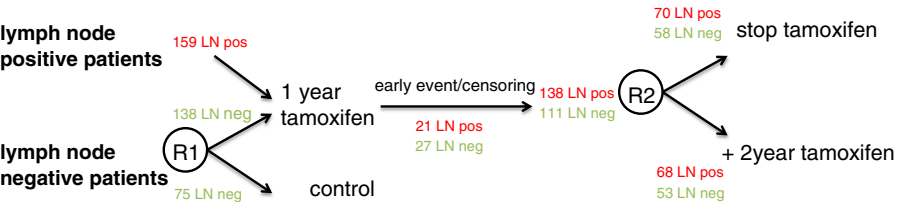

Supplement: MOESM3 [file 9703976]
